# Supplementary material for: Mobile Apps for COVID-19: A Systematic Review of Reviews
Source: MDPI journal article supplement (doi:10.3390/healthcare12020139), 2024-01-08
Supplement: s1 [file s1]

Quality rating using the modified AMSTAR with critical items marked with an \*

| Item number          | 1  | 2*          | 4*          | 5   | 6   | 7*          | 8           | 10  | 16  | AMSTAR Rating  |
|----------------------|----|-------------|-------------|-----|-----|-------------|-------------|-----|-----|----------------|
| Alanzi 2020          | No | No          | Yes         | No  | No  | No          | Yes         | No  | Yes | Critically low |
| Almalki 2021         | No | No          | Yes         | No  | Yes | Partial Yes | Yes         | Yes | Yes | Low            |
| Bassi 2020           | No | No          | Yes         | No  | No  | Partial Yes | Yes         | Yes | Yes | Low            |
| Blacklow 2021        | No | No          | Yes         | No  | Yes | Partial Yes | Yes         | Yes | Yes | Low            |
| Collado-Borrell 2020 | No | No          | Yes         | No  | Yes | No          | Partial Yes | Yes | Yes | Low            |
| Davalbhakta 2020     | No | Yes         | Yes         | Yes | Yes | Yes         | Yes         | No  | Yes | Moderate       |
| Erfannia 2022        | No | No          | Partial Yes | No  | No  | Yes         | No          | No  | No  | Low            |
| Fan 2022             | No | Partial Yes | Yes         | No  | No  | Partial Yes | Yes         | Yes | Yes | Moderate       |
| Islam 2020           | No | No          | Yes         | Yes | Yes | Partial Yes | Yes         | No  | No  | Low            |
| JohnLeonSingh 2020   | No | No          | Yes         | No  | No  | Partial Yes | Yes         | No  | Yes | Low            |
| Kahnbach 2021        | No | No          | Yes         | No  | Yes | Yes         | Yes         | No  | Yes | Low            |
| Kondylakis 2020      | No | No          | Yes         | Yes | No  | Partial Yes | Yes         | Yes | Yes | Low            |
| Kouliaridis 2021     | No | No          | No          | No  | Yes | No          | Yes         | No  | No  | Critically Low |
| Lee 2021             | No | No          | Yes         | Yes | Yes | Yes         | Partial Yes | No  | Yes | Low            |
| Ming 2020            | No | No          | Yes         | No  | No  | No          | Yes         | No  | Yes | Critically low |
| Nazayer 2021         | No | No          | No          | No  | No  | Partial Yes | Partial Yes | Yes | Yes | Critically low |
| Salehinejad 2021     | No | No          | Yes         | No  | No  | Partial Yes | Yes         | Yes | Yes | Low            |
| Wang 2021            | No | No          | Yes         | No  | No  | Partial Yes | Yes         | No  | No  | Low            |
| Akinbi 2021          | No | No          | Yes         | No  | No  | No          | Yes         | Yes | Yes | Critically low |
| Hatamian 2021        | No | No          | Yes         | No  | Yes | No          | Yes         | Yes | No  | Critically low |
| Jenniskens 2021      | No | No          | Yes         | Yes | Yes | Yes         | Yes         | Yes | Yes | Low            |
| Kolasa 2021          | No | No          | Yes         | Yes | No  | Yes         | Yes         | Yes | Yes | Low            |
| Zhang 2021           | No | No          | Partial Yes | Yes | No  | No          | No          | Yes | No  | Critically low |
| Alshawi 2022         | No | No          | Yes         | No  | No  | No          | Yes         | Yes | Yes | Critically low |
