# Supplementary material for: Mobile Apps for COVID-19: A Systematic Review of Reviews
Source: MDPI journal article supplement (doi:10.3390/healthcare12020139), 2024-01-08
Supplement: s1 [file s1]

# Review Protocol: Mobile Apps for COVID 19: A Systematic Review of Reviews

## Administrative Information

| Section and topic | Item No | Checklist Item                                                                |                                                                                            |                                                                              |
|-------------------|---------|-------------------------------------------------------------------------------|--------------------------------------------------------------------------------------------|------------------------------------------------------------------------------|
| Title:            |         |                                                                               |                                                                                            |                                                                              |
| Identification    | 1a      | Protocol for a quasi-systematic review of reviews on mobile apps for Covid-19 |                                                                                            |                                                                              |
| Update            | 1b      | n/a (This protocol is not for an update for a previous systematic review)     |                                                                                            |                                                                              |
| Registration      | 2       | n/a (This protocol is not yet registered)                                     |                                                                                            |                                                                              |
| Authors:          |         |                                                                               |                                                                                            |                                                                              |
| Contact           | 3a      | Felix Holl, M.Sc.                                                             | Research associate,<br>DigiHealth Institute, Neu-Ulm                                       | <a href="mailto:Felix.Holl@hnu.de">Felix.Holl@hnu.de</a>                     |
|                   |         | Marco Aigner, B.Sc.                                                           | Graduate assistant,<br>DigiHealth Institute, Neu-Ulm                                       | <a href="mailto:Marco.Aigner@student.hnu.de">Marco.Aigner@student.hnu.de</a> |
| Contributions     | 3b      | 0.                                                                            | Conceptualization: Felix Holl & Marco Aigner                                               |                                                                              |
|                   |         | 1.                                                                            | Database search: Marco Aigner                                                              |                                                                              |
|                   |         | 2.                                                                            | Title/Abstract & Full text Screening: Felix Holl & Marco Aigner                            |                                                                              |
|                   |         | 3.                                                                            | Data Analysis: Felix Holl & Marco Aigner                                                   |                                                                              |
|                   |         | 4.                                                                            | Manuscript Writing: Felix Holl & Marco Aigner                                              |                                                                              |
|                   |         | 5.                                                                            | Manuscript Review and Editing: Felix Holl, Marco Aigner, Johannes Schobel & Walter Swoboda |                                                                              |
| Amendments        | 4       | Important protocol amendments shall be documented                             |                                                                                            |                                                                              |
| Support           | 5       | No funding to declare                                                         |                                                                                            |                                                                              |

## Introduction

| Section and topic | Item No | Checklist Item                                                                                                                                                                                                                                                                                                                                                                                                                                                                                          |
|-------------------|---------|---------------------------------------------------------------------------------------------------------------------------------------------------------------------------------------------------------------------------------------------------------------------------------------------------------------------------------------------------------------------------------------------------------------------------------------------------------------------------------------------------------|
| <b>Rationale</b>  | 6       | <ul style="list-style-type: none"><li>• To identify and assess already existing reviews on apps for Covid-19</li><li>• To find out whether further research of current health apps for Covid-19 is necessary.</li></ul>                                                                                                                                                                                                                                                                                 |
| <b>Objectives</b> | 7       | <ul style="list-style-type: none"><li>• What previous work has been done to assess current native health apps for Covid-19 (in the United States)?</li><li>• PICO<ul style="list-style-type: none"><li>○ Patients: People at risk of being exposed to SARS-CoV-2 or being diagnosed with Covid-19</li><li>○ Intervention: Reviews of mobile apps for Covid-19</li><li>○ Control: With or without a comparator</li><li>○ Outcome: Metadata, subject of review, methods used, results</li></ul></li></ul> |

## Methods

| Section and topic           | Item No | Checklist Item                                                                                                                                                            |
|-----------------------------|---------|---------------------------------------------------------------------------------------------------------------------------------------------------------------------------|
| <b>Eligibility criteria</b> | 8       | PICO                                                                                                                                                                      |
|                             |         | See Item No 7                                                                                                                                                             |
|                             |         | Study design                                                                                                                                                              |
|                             |         | Reviews                                                                                                                                                                   |
|                             |         | Setting                                                                                                                                                                   |
|                             |         | See Item No 7                                                                                                                                                             |
|                             |         | Time frame                                                                                                                                                                |
| <b>Information Sources</b>  | 9       | n/a                                                                                                                                                                       |
|                             |         | Years considered                                                                                                                                                          |
|                             |         | 01/01/2020 - today                                                                                                                                                        |
|                             |         | Language(s)                                                                                                                                                               |
|                             |         | English                                                                                                                                                                   |
| <b>Search strategy</b>      | 10      | Publication status                                                                                                                                                        |
|                             |         | Peer-Reviewed & Published                                                                                                                                                 |
|                             |         |                                                                                                                                                                           |
| <b>Information Sources</b>  | 9       | <ul style="list-style-type: none"><li>• Databases:<ul style="list-style-type: none"><li>○ Medline</li><li>○ Embase</li></ul></li><li>• No other sources planned</li></ul> |
|                             |         |                                                                                                                                                                           |
| <b>Search strategy</b>      | 10      | 1. Initial Research                                                                                                                                                       |

- a. Search databases (see item no 9)
  - b. Eligibility criteria (see item no 8)
- 2. Title/Abstract Screening
  - a. Screening by two independent researchers
  - b. Discussion on conflicts and agreement on in-/ or exclusion
- 3. Paper retrieval
  - a. Exclude papers that could not be retrieved
- 4. Full-text screening by two independent researchers
  - a. Discussion on conflicts and agreement on in-/ or exclusion
    - i. Documentation of reasons for exclusion
- 5. Analysis and synthesis of remaining studies
  - a. Risk of bias

**Study records:**

|                                |     |                                                                                                                                                                                                                                                                                                                                                                                                          |
|--------------------------------|-----|----------------------------------------------------------------------------------------------------------------------------------------------------------------------------------------------------------------------------------------------------------------------------------------------------------------------------------------------------------------------------------------------------------|
| <b>Data management</b>         | 11a | <ol style="list-style-type: none"> <li>1. Storage of studies               <ul style="list-style-type: none"> <li>○ Result sets are being exported from the databases using text-, .csv or proprietary file-formats</li> <li>○ Results are being imported into Endnote 20</li> </ul> </li> <li>2. The review process (selection, discussion on in-/ or exclusion) is carried out in Covidence</li> </ol> |
| <b>Selection process</b>       | 11b | See item no 10                                                                                                                                                                                                                                                                                                                                                                                           |
| <b>Data collection process</b> | 11c | n/a                                                                                                                                                                                                                                                                                                                                                                                                      |
| <b>Data items</b>              | 12  | <ul style="list-style-type: none"> <li>• Reviews               <ul style="list-style-type: none"> <li>○ Metadata</li> <li>○ Subject of review</li> <li>○ Methods Used</li> <li>○ Results</li> </ul> </li> <li>• Apps               <ul style="list-style-type: none"> <li>○ Total</li> </ul> </li> </ul>                                                                                                 |

|                                           |     |                                                                                                                                                                                                                                                                                                                         |
|-------------------------------------------|-----|-------------------------------------------------------------------------------------------------------------------------------------------------------------------------------------------------------------------------------------------------------------------------------------------------------------------------|
|                                           |     | <ul style="list-style-type: none"> <li>○ Categories</li> <li>○ Countries</li> <li>○ Assessment/Ratings</li> </ul>                                                                                                                                                                                                       |
| <b>Outcomes and prioritization</b>        | 13  | <ul style="list-style-type: none"> <li>• Metadata of studies</li> <li>• Categorization of studies</li> <li>• Study results</li> </ul>                                                                                                                                                                                   |
| <b>Risk of bias in individual studies</b> | 14  | <ul style="list-style-type: none"> <li>• Bias in qualitative studies is to be assessed using the GRADE-CERQual approach.</li> </ul>                                                                                                                                                                                     |
| <b>Data synthesis</b>                     | 15a | <ul style="list-style-type: none"> <li>• Criteria under which study data will be quantitatively synthesized <ul style="list-style-type: none"> <li>○ Number of assessed apps</li> <li>○ Categories of assessed apps</li> <li>○ Methods used to assess apps</li> <li>○ Results of app assessments</li> </ul> </li> </ul> |
|                                           | 15b | <ul style="list-style-type: none"> <li>• Depending on the methods found in studies</li> </ul>                                                                                                                                                                                                                           |
|                                           | 15c | <ul style="list-style-type: none"> <li>• No additional analyses (sensitivity or subgroup analyses, meta-regression) are planned</li> </ul>                                                                                                                                                                              |
|                                           | 15d | <ul style="list-style-type: none"> <li>• Qualitative synthesis with regard to possible effects of mobile apps on Covid-19 or the need to perform further research on the topic</li> </ul>                                                                                                                               |
| <b>Meta-bias(es)</b>                      | 16  | n/a                                                                                                                                                                                                                                                                                                                     |
| <b>Confidence in cumulative evidence</b>  | 17  | n/a                                                                                                                                                                                                                                                                                                                     |
