# Supplementary material for: Mobile Apps for COVID-19: A Systematic Review of Reviews
Source: MDPI journal article supplement (doi:10.3390/healthcare12020139), 2024-01-08
Supplement: s1 [file s1]

Data extraction template

| Item                        | Format/Description                                                                                     | Options                                                               |
|-----------------------------|--------------------------------------------------------------------------------------------------------|-----------------------------------------------------------------------|
| Study ID                    | ID assigned by Covidence<br>(after the #)                                                              |                                                                       |
| Title                       |                                                                                                        |                                                                       |
| Lead author contact details |                                                                                                        |                                                                       |
| Journal                     | Published in                                                                                           |                                                                       |
| Publication Date            | DD.MM.YYYY                                                                                             |                                                                       |
| Type of study               |                                                                                                        | App-Review<br>Literature Review<br>App and Literature Review<br>Other |
| Research Question           |                                                                                                        |                                                                       |
| Notes                       | Room for optional additional notes                                                                     |                                                                       |
| Methods                     | Heading 1                                                                                              |                                                                       |
| App Search                  | Heading 2                                                                                              |                                                                       |
| App search?                 | Were apps searched                                                                                     | Yes<br>No                                                             |
| App search start            | DD.MM.YYYY                                                                                             |                                                                       |
| App search end              | DD.MM.YYYY                                                                                             |                                                                       |
| App search time             | If the exact time span is not given, use this field instead of "app search start" and "app search end" |                                                                       |
| Search platforms            |                                                                                                        | Google Play Store<br>Apple App Store<br>Other                         |
| App search strings          | Separated by commas                                                                                    |                                                                       |
| App search method           |                                                                                                        |                                                                       |
| App search steps            |                                                                                                        |                                                                       |
| App countries               | Countries from which apps were sought.<br>Separated by commas                                          |                                                                       |
| App inclusion               | Separated by commas                                                                                    |                                                                       |
| App exclusion               | Separated by commas                                                                                    |                                                                       |

|                               |                                                                                                                      |           |
|-------------------------------|----------------------------------------------------------------------------------------------------------------------|-----------|
| App Analyzed variables        | Separated by commas                                                                                                  |           |
| App rating                    |                                                                                                                      | Yes<br>No |
| App rating method             | e.g. MARS, ...                                                                                                       |           |
| App categorization            | Have the apps been categorized by the reviewers?                                                                     | Yes<br>No |
| App categorization method     |                                                                                                                      |           |
| Literature Search             | Heading 2                                                                                                            |           |
| Literature Search             | Was literature searched and reviewed within the paper?                                                               | Yes<br>No |
| Using PRISMA                  | Does the study use any variant of the PRISMA approach for systematic reviews?                                        | Yes<br>No |
| PRISMA guideline              | If available, which version of PRISMA has been used?                                                                 |           |
| Literature search start       | DD.MM.YYYY                                                                                                           |           |
| Literature search end         | DD.MM.YYYY                                                                                                           |           |
| Literature search time        | If the exact time span is not given, use this field instead of "literature search start" and "literature search end" |           |
| Literature databases          | Which databases were used for literature review?<br>Separated by commas                                              |           |
| Literature search strings     | Separated by commas                                                                                                  |           |
| Literature inclusion          | Separated by commas                                                                                                  |           |
| Literature exclusion          | Separated by commas                                                                                                  |           |
| Literature search steps       |                                                                                                                      |           |
| Literature analyzed variables |                                                                                                                      |           |
| Results                       | Heading 1                                                                                                            |           |
| App search                    | Heading 2                                                                                                            |           |
| Total apps                    | Total of apps included in the analysis.                                                                              |           |
| App findings                  |                                                                                                                      |           |
| Literature search             | Heading 2                                                                                                            |           |

|                                                |                                         |  |
|------------------------------------------------|-----------------------------------------|--|
| Total studies                                  |                                         |  |
| Literature findings                            |                                         |  |
| Discussion                                     | Heading 1                               |  |
| App discussion                                 | Discussion related to app review        |  |
| Literature discussion                          | Discussion related to literature review |  |
| Other                                          | Heading 1                               |  |
| Limitations                                    |                                         |  |
| Future studies                                 | Recommendations for future studies      |  |
| Study funding sources                          |                                         |  |
| Possible conflicts of interest for the authors |                                         |  |
