# Supplementary material for: Mobile Apps for COVID-19: A Systematic Review of Reviews
Source: MDPI journal article supplement (doi:10.3390/healthcare12020139), 2024-01-08
Supplement: s1 [file s1]

*Table 1 Records excluded during full-text-screening together with reasons for exclusion*

| <b>Study</b>            | <b>Reason for exclusion</b> |
|-------------------------|-----------------------------|
| Thomas 2021             | Wrong intervention          |
| Guisado-Clavero 2021    | Wrong intervention          |
| Gabarron 2021           | Wrong intervention          |
| Abd-Alrazaq 2021        | Wrong intervention          |
| Scott 2020              | Wrong intervention          |
| Storeng 2021            | Wrong intervention          |
| Abbaspur-Behbahani 2022 | Wrong intervention          |
| Asadzadeh 2021          | Wrong intervention          |
| Alonso 2021             | Wrong intervention          |
| Osmanliu 2021           | Wrong intervention          |
| Eslami 2021             | Wrong intervention          |
| Silenou 2021            | Wrong intervention          |
| Grekousis 2021          | Wrong intervention          |
| Lukas 2020              | Wrong intervention          |
| Alo 2021                | Wrong intervention          |
| Aslani 2020             | Wrong intervention          |
| Iyengar 2020            | Wrong intervention          |
| Kumar 2020              | Wrong intervention          |
| Mbunge 2020             | Wrong intervention          |
| LaiSHS 2021             | Wrong intervention          |
| Leite 2021              | Wrong intervention          |
| Mehraeen 2022           | Wrong intervention          |
| García-Iglesias 2020    | Wrong Language              |
| Geissbuhler 2020        | Wrong Language              |
| Wongsin 2022            | Wrong outcomes              |
| Wirth 2020              | Wrong setting               |
| Elkhodr 2021            | Wrong type of papeer        |
| Verhagen 2020           | Wrong type of papeer        |
| Du 2020                 | Wrong type of papeer        |
| Wang 2021               | Wrong type of papeer        |
| Weiß 2021               | Wrong type of papeer        |
| Dixon 2021              | Wrong type of papeer        |
| Vandamme 2020           | Wrong type of papeer        |
| Hogan 2021              | Wrong type of papeer        |
| Grantz 2020             | Wrong type of papeer        |
| Chaudhary 2021          | Wrong type of papeer        |
| Colizza 2021            | Wrong type of papeer        |
| No Author 2020          | Wrong type of papeer        |
| Jahnel 2020             | Wrong type of papeer        |

|                       |                      |
|-----------------------|----------------------|
| Sharma 2020           | Wrong type of papeer |
| Toussaert 2021        | Wrong type of papeer |
| Wu 2021               | Wrong type of papeer |
| Hernandez-Orallo 2020 | Wrong type of papeer |
| Khan 2021             | Wrong type of papeer |
| Wang 2021             | Wrong type of papeer |
| Min-Allah 2021        | Wrong type of papeer |
