# Supplementary material for: Mobile Apps for COVID-19: A Systematic Review of Reviews
Source: MDPI journal article supplement (doi:10.3390/healthcare12020139), 2024-01-08
Supplement: s1 [file s1]

# Template for Quality rating using the modified AMSTAR

## **AMSTAR 1. Inclusion of PICO?**

Did the research questions and inclusion criteria for the review include the components of PICO?

Population, Intervention, Comparator group, Outcome, Timeframe to follow up

1. Yes
2. No

*Extractors will also be able to add supporting text to justify their judgements*

## **AMSTAR 2. Adherence to protocol?\***

Did the report of the review contain an explicit statement that the review methods were established prior to the conduct of the review and did the report justify any significant deviations from the protocol?

Can mean inclusion of review questions, search strategy, inclusion/exclusion, risk of bias assessment,

1. Yes
2. Partial Yes
3. No

*Extractors will also be able to add supporting text to justify their judgements*

## **AMSTAR 4. Comprehensive search strategy?\***

Did the review authors use a comprehensive literature search strategy?

At least 2 databases, keywords and search strategy provided, publication restrictions justified

1. Yes
2. Partial Yes
3. No

*Extractors will also be able to add supporting text to justify their judgements*

## **AMSTAR 5. Duplicate study selection**

Did the review authors perform study selection in duplicate?

At least two reviewers independently agreed on selection and achieved consensus OR two reviewers selected a sample of eligible studies and achieved good agreement ( $\geq 80\%$ )

1. Yes
2. No

*Extractors will also be able to add supporting text to justify their judgements*

## **AMSTAR 6. Duplicate data extraction**

Did the review authors perform data extraction in duplicate?

At least two reviewers achieved consensus on which data to extract OR two reviewers extracted data from a sample of eligible studies and achieved good agreement ( $\geq 80\%$ )

1. Yes
2. No

*Extractors will also be able to add supporting text to justify their judgements*

**AMSTAR 7. Justification of exclusion\***

Did the review authors provide a list of excluded studies and justify the exclusions?

1. Yes
2. Partial Yes
3. No

*Extractors will also be able to add supporting text to justify their judgements*

**AMSTAR 8. Detailed study description**

Did the review authors describe the included studies in adequate detail?

Population, Intervention, Comparators, Outcomes, Research Designs

1. Yes
2. Partial Yes
3. No

*Extractors will also be able to add supporting text to justify their judgements*

**AMSTAR 10. Reporting of funding**

Did the review authors report on the sources of funding for the studies included in the review?

1. Yes
2. No

*Extractors will also be able to add supporting text to justify their judgements*

**AMSTAR 16. Conflicts of interest?**

Did the review authors report any potential sources of conflict of interest, including any funding they received for conducting the review?

1. Yes
2. No

*Extractors will also be able to add supporting text to justify their judgements*
