# Supplementary material for: Mobile Apps for COVID-19: A Systematic Review of Reviews
Source: Healthcare (Basel). 2024 Jan 8;12(2):139. doi: 10.3390/healthcare12020139 (PMC10815093; doi:10.3390/healthcare12020139)
Supplement: Supplementary file 1 [file healthcare-12-00139-s001.zip]

Archive with 6 entries (6 files):
- S1.pdf
- S2.xlsx
- S3.pdf
- S4.pdf
- S5_AMSTAR-Template.pdf
- S6_Quality rating using the modified AMSTAR.pdf
