# Supplementary material for: Mobile Apps for COVID-19: A Systematic Review of Reviews
Source: Healthcare (Basel). 2024 Jan 8;12(2):139. doi: 10.3390/healthcare12020139 (PMC10815093; doi:10.3390/healthcare12020139)
Supplement: Supplementary file 1 [file healthcare-12-00139-s001.zip › S2.xlsx]

## Sheet: overviewTable_reformatted
Study ID	Title	Journal	Publication Date	Type of study	Research Question	App search?	App search start	App search end	App search time	Search platforms	App search method	App search steps	App countries	App inclusion	App exclusion	App Analyzed variables	App rating	App rating method	App categorization	App categorization method	Literature Search	Using PRISMA	PRISMA guideline	Literature search start	Literature search end	Literature search time	Literature databases	Literature search strings	Literature inclusion	Literature exclusion	Literature search steps	Literature analyzed variables	Total apps	App findings	Total studies	Literature findings	App discussion	Literature discussion	Limitations
Blacklow 2021	Usability, inclusivity, and content evaluation of COVID-19 contact tracing apps in the United States.	Journal of the American Medical Informatics Association	06/22/2021	App and Literature Review	Application of an evaluation framework presented in this publication in order to analyze the usability of COVID-19 contact tracing apps.	Yes	01/06/2020	11/12/2020		Google Play Store; Apple App Store		1. search using search strings 2. exclusion of apps based on pre-determined exclusison criteria	USA	contact tracing apps for Covid-19	target audience outside the US, no individual contact tracing, restricted to members of specific institutions, QR-code scanning required, requiring e-mail registration	user characteristics (e.g. readability and language), user interface (racial and gender diversity in visual elements, number of clicks)	Yes	FDA Applying Human Factors and Usability Engineering to Medical Devices framework			Yes	No		10/06/2020	11/12/2020		Pubmed, medRxiv, Google	covid* OR coronavirus OR contact tracing) AND (app OR apps), covid app, contact tracing app, coronavirus exposure notification					26	Most prominent developer state and county government-affiliated entities (n = 19). Most apps (n = 20) are available on both Android and iOS. Six public health departments only offer an Android App. 69 % (n = 18) apps are above 9th grade readability. 65 % of apps (n = 17 ) are available only in English, while 19 % (n = 5) are available in more than 3 languages. 85 % of apps (n = 22) do not require…			Most room for improvement in inclusivity for potential users (readability, multilingualism, use of audiovisual features). Furthermore, none of the apps include direct links to social support services that may be needed in case of exposure alerts.		Not all desired features might have been released by the time of the review, no usage of broader usability metrics from other research, no interaction with the exposure alert systems, evaluation of English apps only, apps might have changed over the course of the review and afterwards
Davalbhakta 2020	A Systematic Review of Smartphone Applications Available for Corona Virus Disease 2019 (COVID19) and the Assessment of their Quality Using the Mobile Application Rating Scale (MARS)	Journal of Medical Systems	07/10/2020	App and Literature Review	To provide a systematic review of the literature on mobile applications with multiple functions and rating of app's quality using MARS.	Yes				Google Play Store; Apple App Store; Other: National Health Services (NHS) Apps library, Myhealthapps.net		1. app search using strings and platforms 2. screening on inclusion criteria using title, description and functions around Covid-19 3. data extraction and assessment of apps using MARS 4. statistical analysis to compare mean values between Asian, European and North American apps and to analyze correlation between number of downloads and MARS score	India, United Kingdom, United States	released or updated for Covid-19 until 05.05.2020, main subject matter as Covid-19, English or Hindi language	duplicates, pay to download,		Yes	MARS	Yes	Based on continent	Yes	Yes		05/09/2020	05/10/2020		Medline, Cochrane central register for controlled trials, Google Scholar, Turning Research Into Practice medical database	Covid, Corona, Pandemic, Covid-19, SARS-COV-2, Novel coronavirus, 2019-nCoV, smartphone		language other than English, subject matter unrelated to the use of smartphone apps in Covid-19,			63	Most apps (n = 27; 39 %) are developed through federal efforts followed by commercial units (n = 13; 21 %), universities (n = 5; 7 %), an NGO (n = 1; 1 %) and unknown organisations (n = 16; 24 %). The most downloaded app is 'Aarogya Setu' by the Indian government with 50,000,000+ downloads. The mean MARS score is 3.7/5 (SD 0.58). Categories with the most apps with a rating higher or equal to 4 (n…	10	Majority of ongoing research focuses on the development of contact-tracing apps, information dissemination and diagnostics. Only one application included in the study (COVID-19 Symptom Tracker) conducted an observational study to provide evidence on the app's utility. Results predict that the app may be able to predict incidence in advance.	Most apps are rated with above average quality. Most apps score highest in functionality and lowest in engagement. Large number of apps can cause confusion among users on which app to use. Apps developed in the West focus more on information dissemination with few contact tracing apps, while most Apps from India have a main purpose of contact tracing and symptom checking. The 'Aarogya Setu' app f…		app languages other than English or Hindi, reviewer's subjectivity, apps may change through updates, end user reviews were not taken into account, number of downloads may differ between regions (populations, laws)
Nazayer 2021	Contact-tracing applications: A review of technologies	BMJ Innovations	04/12/2021	App-Review	To review and compare design choices in digital contact tracing apps with regard to available technologies and architectural patterns.	No															Yes	No				August 2020 - October 2020	Google Scholar	COVID-19, contract tracing, applications, apps, survey, review	published, English language, regarding developed digital contact tracing applications	not dealing with automated contact tracing, purely technical focus, mainly a survey of user's impressions on applications, only dealing with an overall country response to COVID-19, purely covering machine learning and big data analytics, mainly dealing with protocols, policies and guidelines, only providing only one improved version of an existing contact tracing application, purely medical focus	1. search 2. abstract screening 3. analysis				9	Authors begin with a comparison of centralised and decentralised patterns for contact tracing apps. Centralised patterns provide low privacy from authorities, require registration, are viable in small and large disease outbreaks, may provide data for research, allow the identification of secondary cases (e.g. having been in contact with another contact person), require comparably low processing r…		Authors remark that each technology and software pattern may introduce unique limitations, which may be partially bypassed through technology integration (e.g. WiFi/Bluetooth based apps using a centralised architecture with cryptographic measures to "enhance the effectiveness and security" of an app)	1. hybrid architectures were not discussed in the article 2. accuracy of technology was discussed only based on literature
Wang 2021	Investigating Popular Mental Health Mobile Application Downloads and Activity During the COVID-19 Pandemic.	Human Factors	03/07/2021	App-Review	To analyze the changes in downloads and activity of users of select popular mental health mobile applictions.	Yes					16 most popular apps out of a list of 25 most popular behavioral health apps (by downloads) by Carlo et al. 2019 were analyzed.		United States	iOS app, only free functions and features were considered in the rating.	cognitive training app		Yes	MARS, Popularity Analysis (development of download numbers in relation to the pandemic)			Yes	No					Medline, clinicaltrials.gov						16	13/16 apps (81 %) showed an increase in the number of downloads. Three apps (19 %) had fewer downloads than pre-pandemic. Activity data was available for 8 apps (50 %) out of which the majority (5/8; 62,5 %) had in increase in activity). Mean daily downloads were significantly higher post-pandemic for the majority of apps (10/16; 62,5 %). MARS: The best rated dimension was functionality (M = 4.40…			Study shows a growth in initial interest and adoption of mental mHealth apps (primarily meditation), which may coincide with increasing mental health issues due to the pandemic. Although apps are generally satisfactory with regard to functionality and aesthetics, there is a lack of evidence supporting their effectiveness. More than half of the reviewed apps (9/16) claimed to have been tested thro…		1. Metadata could only be retrieved through third-parties and might therefore be flawed 2. Activity data is only available when devs allow it 3. Cross-sectional study 4. No systematic review => Selection of apps based on list by Carlo et al. 5. seasonal variations in mental health issues may affect changes in downloads 6. only free apps and features were assessed
Kouliaridis 2021	Dissecting contact tracing apps in the Android platform.	PLOS ONE	05/14/2021	App-Review	Analysis of data security and privacy of Android-based European contact tracing apps through static and dynamic code analysis.	Yes	02/02/2021	02/02/2021		Google Play Store			Austria, Belgium, Bulgaria, Croatia, Cyprus, Czech Republic, Denmark, Estonia, Finland, France, Germany, Hungary, Ireland, Italy, Latvia, Lithuania, Malta, Netherlands, Norway, Poland, Portugal, Slovakia, Slovenia, Spain, Switzerland, UK				Yes	Static and dynamic code analysis			No												26	Apps are analyzed through static (high and low level) and dynamic analysis. All Google-Apple-Exposure-Notification (GAEN) seem to follow baseline policy, which means that they only request the very minimum permissions of Bluetooth and Network. Three apps additionally declare the permission for the camera (scanning of QR codes?). High-level static analysis: 21 apps contain at least one external, n…			Bases on downloads, app penetration is still not high. In many cases, apps violate the so-called principal of minimal privilege. In general, many apps contain potential security risks, either by declaring to many app permissions, insecure shared libraries, or outdated third-party software. Aside from that, many apps are potentially vulnerable to some popular weaknesses that could endanger data se…
Fan 2022	The function and quality of individual epidemic prevention and control apps during the COVID-19 pandemic: A systematic review of Chinese apps.	International Journal of Medical Informatics	01/31/2022	App-Review	1. To investigate the functional characteristics of individual epidemic prevention and control apps in China 2. Evaluate App quality	Yes	01/21/2021	01/25/2021		Google Play Store; Apple App Store; Other: WeChat	PRISMA systematic literature review guidelines	1. identification 2. screening of title, summary and/or description 3. screening by using installed apps 4. analysis	China	individual epidemic prevention and control apps in China, relation to Covid-19	no health self-checking and reporting or tracking function, non-simplified Chinese language, availability only to internal personal of the organization, main purpose of advertising and product selling		Yes	MARS	Yes	health self-checking and reporting, news about COVID-19, scientific publicity and education, telemedicine services, personal travel inquiries, digital contact tracing	No												20	11 apps were designed both for Android and iOS. 11 apps were developed by Chinese government departments, the other 9 apps by commercial organizations. Main target groups are the general population (70 %), student population (20 %) and employees of enterprises and institutions (10 %). MARS quality assessment: All 20 apps have acceptable quality (MARS-score >= 3). The highest scores across all thr…			The main purposes of analyzed apps are health self-checking and reporting (17,85 %), and personal travel inquiry functions (14,7 %). A diversity of apps designed each for different regions reduce the usability across regions. 4 apps and 4 WeChat applets have multiple functions including consultation, education, contact tracking and local epidemic risk information. China has a top-down policy rega…		Cross-sectional study (app markets develop), exclusion criteria (apps that require organizational logins, apps that can not be opened due to old iOS version), heterogenity of Chinese language makes finding suitable search-terms difficult, choice of app-stores (Apple Store, Google Play, WeChat)
Erfannia 2022	Reviewing and Content Analysis of Persian Language Mobile Health Apps for COVID-19 Management.	Studies in Health Technology and Informatics	01/2022	App-Review	to systematically search in app stores and intended to carry out content analysis of free Persian mobile health apps in the management of COVID-19 and, ultimately determine the relationship between the popularity and quality of these apps.	Yes			May 2021	Google Play Store; Apple App Store; Other: Myket, Bazzar	Based on PRISMA 2020	1. Identification 2. Screening 3. Eligibility 4. Analysis	Iran	launch at the time of the epidemic, focused on the management of COVID disease in terms of diagnosis, education, follow-up and counseling		custom checklist with 37 questions divided among five axes (ease of use, privacy, data sharing, education, monitoring) with yes or no questions	Yes	custom check-list			No												4	Safirane Salamat app received the highest score on the author's custom rating scale (29) followed by Ac19 (26) and Mask (21).			All four apps that are analyzed score as "acceptable" according to the author's custom scale. There is no correlation found between the popularity of apps and their quality.
Salehinejad 2021	A review and content analysis of national apps for COVID-19 management using Mobile Application Rating Scale (MARS)	Informatics for Health and Social Care	11/09/2020	App-Review	To identify popular COVID-19 management apps, describe their features and analyze their quality using MARS.	Yes			May 2020	Google Play Store; Apple App Store	app-store-search	1. search 2. screening of titles and descriptions 3.	Canada, United Arabic Emirates, Brazil, Pakistan, United States, Jamaica, Oman, Vietnam, Australia	developed by governments and national departments	non-English language, designed for residents of one country only, requiring phone number or national code for registration	descriptive data (name, country, developer, platform, version, last update, rating, free of charge, focus), MARS criteria	Yes	MARS	Yes	descriptive data	No												13	Two apps (15 %) were developed in the USA and Australia respectively. Canada, the UAE, Brazil, Pakistan, Jamaica, Oman and Vietnam developed one app each (7 %). Another two apps (15 %) were from the WHO. Five apps (38.5 %) were developed by a countries ministry of health and the rest by different governmental organizations. Most apps (n = 11; 84.5 %) exist for both iOS and Android while 2 apps (1…			Most functionalities were information dissemination, self-assessment and contact-tracing.		1. Omission bias 2. most apps were designed only for use within their country and for registration using the app phone numbers or national codes were needed. 3. cross-sectional study => apps may evolve
Ming 2020	Mobile Health Apps on COVID-19 Launched in the Early Days of the Pandemic: Content Analysis and Review	JMIR mHealth and uHealth	09/16/2020	App-Review	To analyze and evaluate the contents and features of Covid-19 mobile apps.	Yes	04/18/2020	05/05/2020		Google Play Store; Apple App Store	App-store search	1. search and identification 2. deduplication 3. app screening 4. full app assessment 5. analysis	United States	launched for smartphone users, related to COVID-19, user interface in English language	mobile app launched on device other than smartphone (e.g. iPad, tablet or laptop), designed to provide quarantined users with grocery or pharmacy supplies, app to collect funds in support of organization affected by Covid-19	basic features (no internet requirement, size of less than 50 MB, no need for subscription, educational content, export functionality, automated data entry, advisory functions), functionalities (knowledge, tracing or mapping of COVID-19 cases, home monitoring surveillance, online consultation with a health authority, official mobile apps run by a health authority)	Yes	Custom variables are rated either 0 or 1. The total sum is calculated.	Yes	iOS and Android, iOS only, Android only (each with regard to basic features and functions).	No												58	With regard to basic features, the scores based on the existence of predetermined custom basic features range from 2 to 6 (max of 7). A majority of the apps from the App Store (29/30, 96.7%) and Google Play (26/28, 92.9%) require internet connectivity to be accessed. There is a higher proportion of mobile apps from Apple (17-23/30, 56.7%-76.7%) that can be accessed without any subscription while …			With regard to basic features, 2 (out of 18) Android apps reach a highest score of 6 and 8 (out of 20) apple apps reach a highest score of 5. Authors emphasize the app COVID Symptom tracker which they think to be globally usable. Authors formulate a set of recommendations for mobile developers to consider: 1. Recommendation to maintain health-related apps by health authorities in order to avoid t…		1. Seach for Covid-19 related keywords has been disabled by Google in the play store 2. cross-sectional study => apps develop over time 3. gaps through lack of access to some apps 4. no usability study has been conducted.
Lee 2021	Mobile Apps Leveraged in the COVID-19 Pandemic in East and South-East Asia: Review and Content Analysis	JMIR mHealth and uHealth	11/11/2021	App-Review	1. To examine free apps developed by governments in the East and South-East Asian region and highlight their key characteristics and functions 2. To interpret the correlation between the release of public health policies and apps or app updates.	Yes	05/01/2021	05/07/2021		Google Play Store; Apple App Store	Modified version of the PRISMA extension for Scoping Reviews. App-store search is supplemented by news articles and media reports.	1. search 2. deduplication 3. screening of title, keywords and description 4. screening based on inclusion criteria 5. analysis	Singapore, Taiwan, Hong Kong, South Korea, China, Japan, Thailand, Vietnam, Malaysia, Philippines, Indonesia	related to Covid-19, free of charge, released or updated with Covid-19 related functionality during research period, available to users on the search date, developed or supported by governments or authorities, with full information regarding the app accessible	either developed by global organization, non-governmental organization or community not representing a government or a broader region.	country of origin, platform availability, release date, developer, target users, uptake requirement, required technology	No		Yes	analyzed variables (see above), functions,	Yes	No		05/07/2021	05/07/2021		Medline, Google Scholar	(“digital health” OR “m-health” OR “mobile health” OR “e-health” OR “mobile apps”) AND (“COVID-19” OR “coronavirus” OR “SARS-CoV-2”)			Results were screened for potentially interesting apps to include in the analysis.		46	Characteristics: Most apps were from Vietnam (n = 9, 20 %), followed by Malaysia, Singapore and Thailand (n = 6, 13 % each), Japan (n = 4, 9 %), Hong Kong, Indonesia, South Korea and Taiwan (n = 3, 7 % each), China (n = 2, 4 %) and the Philippines (n = 1, 2.2 %). All 46 apps (100 %) were available on the Play Store, with 45 (98 %) on the Apple App Store. For more than half of the apps (n = 24, 52…			While most apps initially focused on information and monitoring of high risk areas, subsequentially other features such as contact tracing and features with regard to vaccination were added. Authors remark that since Alanzi's review, a lot of new mobile apps have emerged. Some governments (Japan, Malaysia, Vietnam) have developed city- or state-level apps that aim for more regional tailored measu…		1. some apps may be missing, due to regional restrictions in app stores 2. no data was collected on consumer ratings or feedback. Neither were popularity or number of downloads considered 3. mobile uptake proportion with regard to different socioeconomic backgrounds was not regarded.
Kahnbach 2021	Quality and Adoption of COVID-19 Tracing Apps and Recommendations for Development: Systematic Interdisciplinary Review of European Apps	Journal of Medical Internet Research	06/02/2021	App-Review	1. To investigate the quality characteristics of national European COVID-19 contact tracing apps 2. to investigate associations between app quality and adoption 3. identify app features that contribute to high quality	Yes			unavailable	Other: Google Search to identify apps, which then were directly downloaded from Google Play and Apple App Store	Web-Search	1. Web-Search 2. Direct download of apps in app- stores	Austria, Belgium, Croatia, Czech Republic, England/Wales, Estonia, Finland, France, Germany, Iceland, Ireland, Italy, Latvia, Malta, Netherlands, Poland, Portugal, Scotland, Slovenia, Spain, Switzerland	Member states of the EU and countries of the European Trade association that share the European Data Protection Regulation or equivalent laws, tracing app, launched by national health authority, voluntary app use, unrestricted access to app, English version available, launch at least 4 weeks before the review		title, description, number of downloads	Yes	MARS, self-calculated adoption rate, linear regression to identify correlation between MARS rating and adoption rate as well as adoption and infection rate	No		No												21	MARS interrater reliability: excellent interrater reliability for 2apps, good for 17 and low for 2 (resolved through discussion and consensus). Above average MARS quality with average rating of 3.97 (Highest Ireland with 4.42). Average functionality, aesthetics and information quality scored over 4 points with similar results across apps. Engagements scores are lower with larger differences acros…			Compared to the study of Davalbhakta et al., app quality rose over time with an overall MARS rating of + 0.52 points (+ 13 %), which is likely explained through more time leading to further development of the apps. In accordance with other apps, the study suggests a possible under-emphasis on engagement-friendly designs. It also suggests that leveraging engagement features may increase average ad…		1. cross sectional study 2. number of downloads used for adoption rate calculation 3. in case of uncertainty, higher values were assumed for MARS 4. unability to check if sensors work properly 5. no review of medical information 6. MARS not including a section on privacy 7. no assessment on how apps are embedded into healthcare sytsems
Islam 2020	A Review on the Mobile Applications Developed for COVID-19: An Exploratory Analysis	IEEE Access	08/07/2020	App-Review	To explore the existing mobile applications developed for the COVID-19 pandemic.	Yes	04/30/2020	04/30/2020		Google Play Store; Apple App Store; Other: Microsoft Store	Systematic app-store search	1. identification 2. screening of title, description and screenshots 3. second round of screening of title, description and screenshots 4. data extraction 5. evaluation	Global, Brazil, France, Vietnam, India, Greece, Bangladesh, UK, Canada, Spain, Australia	developed for the COVID-19 pandemic		name, rating, release date, version, cost, platform, privacy policy, country context, language	No		Yes	Custom categorization into an affinity diagram	No												25	Authors categorize 9 app objectives that contain 26 functionalities. Most applications are developed for multiple purposes. Purposes are provision of remote assistance (n = 14; 56 %), patient monitoring (n = 12), infection status (n = 18), Covid-19 prevention (n = 15), Covid-19 control (n = 10), communication support (n = 8), treatment services (n = 12), awareness raising (n = 17) and improving m…			To date only a limited number of applications have been developed. The review identifies 9 main purposes of Covid-19 apps together with functionalities to achieve these purposes. It also identifies 10 system design characteristics that are related with user satisfaction.		1. Completeness given search criteria 2. cross-sectional study: later apps are not included 3. qualitative analysis possibly being subjective 4. no distinction made between must-have and nice-to-have features
Collado-Borrell 2020	Features and Functionalities of Smartphone Apps Related to COVID-19: Systematic Search in App Stores and Content Analysis	Journal of Medical Internet Research	08/25/2020	App-Review	to identify smartphone apps designed to address the COVID-19 pandemic and to analyzetheir characteristics.	Yes	04/27/2020	05/02/2020		Google Play Store; Apple App Store	Based on PRISMA	1. search apps using search strings and inclusion criteria 2. analysis of information on each platform 3. download and further analysis of app	Publication is from Spain => Spanish App Stores	relation to Covid-19,		name, platform, country of origin, language, category, cost, date of last update, size, version, number of downloads, developer and purpose (news, general information, self diagnosis, contact tracing, alerts to contacts, notification of closed cases, awareness, helplines, monitoring of clinical parameters, symptom log, treatment log and messaging with healthcare professionals)			Yes	By variables as e.g. app-store category, developer or purpose	No												114	54 % (n = 62) Android, 45.6 % (n = 52) Apple and 43.9 % (n = 50) both platforms. Most apps are developed in Europe (n = 37; 32.5 %), Asia (n = 32; 28.1 %) and North America (n = 30; 26.3 %). Most common languages are English (n = 65; 57 %), Spanish (n = 34; 29.8 %) and Chinese (n = 14; 12.3 %). Average number of languages per app is 1.9 with a range from 1 to 12. Most frequent categories are heal…			The authors highlight, that the majority of apps is developed by governments, in contrast to other app reviews related to health, in which the leading developer is typically a scientific foundation or hospital. Authors do not identify any relationship between # of apps developed and the severity of the disease in that location. There in a special emphasis on data protection, as there are countrie…		Cross-sectional nature: Information can become outdated as the pandemic evolves.
Bassi 2020	An overview of mobile applications (apps) to support the coronavirus disease 2019 response in India	Indian Journal of Medical Research	05/01/2020	App-Review	This study was aimed to systematically review COVID-19 related mobile apps and highlight gaps to inform the development of future mHealth initiatives.	Yes	04/01/2020	05/03/2020		Google Play Store; Apple App Store	Custom	1. Search using search strings and inclusion/exclusion criteria 2. screening of title and full description 3. app review with extraction of specific functions 4. classification of apps using the WHO guideline on Digital Health Interventions	India		games, neither English nor Hindi language, apps on infectious diseases without focus on Covid-19	name, developer, target user group, Covid-19 specific functions	No		Yes	WHO guideline on Digital Health Interventions	No												50	All apps are free of charge. Most apps are developed by health agencies (n = 41) followed by private/non-government developers (n = 7) and the government of India (n = 2). Target groups: 2/3 (n = 34) for general public, 19 for quarantined people, 2 for caregivers and 1 app for both tested individuals, police officials and researchers respectively. Functions mapped against WHO guidelines: Dissemin…			Different states developed own apps that have similar functionality which spreads usage among those multiple apps. The Aarogya Setu app is supposed to be the main app with regard to contact tracing, aiming for a penetration above 70 %. Most prominent feature is information dissemination regarding preventative measures. Fake News remain a threat. The majority of apps did not have functions in orde…		User feedback is not assessed.
Almalki 2021	Health Apps for Combating COVID-19: Descriptive Review and Taxonomy	JMIR mHealth and uHealth	03/02/2021	App-Review	This review aims to identify, analyze, and categorize health apps related to COVID-19 that are currently available for consumers in app stores; in particular, it focuses on exploring their key technical features and classifying the purposes that these apps were designed to serve.	Yes	04/20/2020	09/11/2020		Google Play Store; Apple App Store; Other: Current news articles and google searches have been used to identify further apps	PRISMA-ScR (Preferred Reporting Items for Systematic Reviews and Meta-Analyses Extension for Scoping Reviews)	1. Screening of title, description and keywords 2. deduplication 3.data extraction 4. technical feature identification using open coding 5.	No restrictions on country of origin or language	health app, available during search period, available in Google Play and Apple Store, related to combating COVID-19, able to collect or share data, available to the public	primary dedication to respiratory disease other than COVID-19 (e.g. asthma), removal from app stores during screening or analysis phase,	name, release date or date of version with COVID-19 features added, country of origin, author or developer's name, technical features, source	No		Yes	Open coding with "Dedoose"	No												115 (Apple Store, n = 106, Google Play, n = 9)	99 % of apps are free of charge. Most prominent developers are governments or national authorities with others being private companies, nonprofit organizations, universities or research centers and hospitals. 115 countries were included. Most common technical feature was basic health information & FAQs (contrary to Alanzi!). The other most common features in this order are contact tracing, alert …					App stores were used in one single country, therefore international apps could have been missed. No assessment of app quality. Some apps developed by national authorities were excluded because information would be inaccessible.
Alanzi 2021	A Review of Mobile Applications Available in the App and Google Play Stores Used During the COVID-19 Outbreak	Journal of Multidisciplinary Healthcare	01/12/2021	App-Review	What are the functionalities and effectiveness of the most common free mobile health applications available in the Google Play and App stores used in Saudi Arabia, Italy, Singapore, the United Kingdom, USA, and India during the COVID-19 outbreak?	Yes			August 2020	Google Play Store; Apple App Store			India, United States, Saudi-Arabia, Italy, United Kingdom, Singapore, Australia	free of charge, launched and updated during the COVID-19 outbreak for the management of COVID-19, launched and supported by governments of the selected countries		general information (price, ratings, platform, country status), purpose and services (user status-risk assessment, self-assessment, test results reporting, online consultation, contact tracing), learnability (personalized notes, education resources, COVID-19 information), communication strategies (query resolution, appointments, social networking, notifications), design features (data visualizati…	Yes		Yes	custom (see analyzed variables)	No												12	10/12 apps feature risk assessment together with the ability to report test results. 9/12 provide contact tracing. 4/12 allow self assessment. 2/12 provide services for E-travel-permits. 1 application with test reporting that does not enable contact tracing. Most prominent features are contact tracing, test result reporting and self-assessment. Other features are note taking, access to educationa…					App analysis limited by app search and therefore by inclusion criteria including selected countries.
Kondylakis 2020	COVID-19 Mobile Apps: A Systematic Review of the Literature	Journal of Medical Internet Research	12/09/2020	Literature Review	Overview over studies that have used and evaluated mobile Covid-19 apps. Identification of app purposes and evidence on usefullness.	No															Yes	Yes				June 2020	PubMed, Scopus, WHO global research database on Covid-19	(mobile health) OR (mhealth) OR (smartphone) OR (mobile phone) OR (mobile application) OR (mobile app) OR (app) AND (COVID-19)	mHealth apps used for prevention, treatment or management of Covid-19, app's features described, evidence on real-life implementation, quantitative outcomes, clinical professionals involved in either design or validation of apps, written in English	care report, letter to editor, preprint paper, qualitative study, survey or review, simulation study, study describing protocols	1. database search 2. title/abstract screening 3. full-text screening 4. analysis using the Effective Public Health Practice Project Tool to assess methodological quality	target, mobile app main features, study design, number of enrolled participants, age of participants, follow-up duration, outcomes and whether positive or negative, implications for clinical practice			12	EPHPP assessment on methodological quality shows moderate quality for 2 (17 %) and weak quality for the remaining 10 (83 %) studies. Reasons being observational or cross-sectional study design, insufficient controlling for confounders, insufficient reporting on validity and reliability of used tools for data collections, no description on withdrawals and dropouts. Interventions: 1 study describes…		There are hints that apps may support information dissemination, symptom tracking (including mental health), home monitoring and isolation, research (discovery of new predictors) and resource allocation. Despite the global focus on the pandemic, studies providing evidence are sparse. One reason could be that researchers wanted to respond quickly to the pandemic, leading to the publication of earl…	1. no use of related search-terms such als "telehealth" 2. limited number of databases 3. no exploring of gray literature 4. no assessment of interrater reliability 5. meta analysis not possible due to heterogenous data 6. possible differences between the quality of included studies and the apps assessed within them.
JohnLeonSingh 2020	Mobile Health Apps That Help With COVID-19 Management: Scoping Review	JMIR Nursing	08/06/2022	Literature Review	To scope the evidence base on apps that were developed in response to COVID-19.	Yes	03/25/2020	05/05/2020		Other: Online articles from literature search	Apps were extracted out of online articles	1. literature review 2. identification of apps 3. data extraction 4. analysis	China, France, Germany, Iran, Italy, Russia, Spain, Turkey, United Kingdom, United States, Hong Kong, Iceland, India, Indonesia, Malaysia, Poland, Singapore, South Korea, Taiwan	related to Covid-19	not relevant to Covid-19, language other than English		No		Yes	Contact tracing, quarantine apps, symptom monitoring apps, information provision	Yes	Yes	Extension for Scoping Reviews	25.03.2020	05.05.2020		Google Scholar, Scopus, Medline	coronavirus, COVID-19, nCOV19, contact tracing, information providing apps, symptom tracking, mobile apps, mobile applications, smartphone, mobile phone, mHealth, China, France, Germany, Iran, Italy, Russia, Spain, Turkey, United Kingdom, United States, Hong Kong, Iceland, India, Indonesia, Malaysia, Poland, Singapore, South Korea, Taiwan	articles that have a clear description of features used in apps for covid-19, released between 09.12.2019 to 05.05.2020,	not relevant to Covid-19, language other than English			29	14 apps are on contact tracing alone, 1 app with both contact tracing and quarantine features together, 6 apps purely for enforcing quarantine, 5 apps on symptom monitoring, 1 app with both symptom monitoring and information provision, 1 app with symptom monitoring and research purposes, 1 app solely for research purposes. 20 apps are released from governments followed by 3 from private organizat…	46	46 articles from 19 different countries. Most articles are from news sites, health care organizations and government sites. 13/19 countries already had contact tracing apps or apps under development, followed by symptom monitoring apps (6/19).	Key types of apps are contact tracing, symptom monitoring and information provision through social media. Most apps are for contact tracing. Most apps are developed by health organisations and governments. Bluetooth-enabled contact tracing is the most popular method. Key issue is the handling of privacy concerns. Authors raise the point on developing one singular app instead of one per country ea…		1. articles mainly from news articles, online webpages and non peer-reviewed journal articles 2. country specific apps could not be analyzed 3. languages other than English were not included 4. only apps that were already available or under development were included
Kolasa 2021	State of the Art in Adoption of Contact Tracing Apps and Recommendations Regarding Privacy Protection and Public Health: Systematic Review	JMIR mHealth and uHealth	06/10/2021	App and Literature Review	1. How do available contact tracing apps allow for data collection for public health benefits and comply with standards of data privacy? 2. Can the balance between public health interests and the protection of personal data be stablished to sndure the broad use of digital technologies?	Yes				Other: Through Literature Search											Yes	Yes		12/10/2022	08/31/2020		Medline, IEEE, ACM Digital Library	("contact tracing"[All Fields] OR "contact detector"[All Fields] OR "contact mapping"[All Fields]) AND ("COVID-19"[All Fields] OR "covid 2019"[All Fields] OR "severe acute respiratory syndrome coronavirus 2"[All Fields] OR "2019-nCoV"[All Fields] OR "SARS-CoV-2"[All Fields]), ((((((("All Metadata":"contact tracing") OR "All Metadata":"contact detector") OR "All Metadata":"contact mapping and COVI…	research article, English, presenting specific contact-tracing app	other article type (news article, editorial, commentary, review, letter)	1. Identification 2. Deduplication 3. Title/Abstract-screening 4. Full-text-screening 5. Extraction of 38 apps out of 47 full-texts 6. Inclusion of supplementary sources 7. Exclusion of apps 8. 21 apps in the analysis		21	11 criteria assessed how digital technologies fulfilled public health interests. Three most frequent functions were information about geographical coverage, contact alerting and governmental responsibility. 90% (n=19) of apps were supported by governments. 95% (n=20) of apps required confirmation of infection. 12 criteria verified to what extent digital technologies complied with data privacy gui…			1. The majority of reviewed contact-tracing apps were mostly compliant with data privacy standards with 86% (n=18) allowing for voluntary use an, 76% (n=16) using a decentralized architecture and 71% (n=15) relying on Bluetooth. 2. There is room for improvement regarding public health interests. Only 38% of apps (n=8) defined "close contact". Not all apps had governmental accountability. 8 out of…		1. apps later than search not included. HealthLynked COVID-19 tracker app not included due to lack of information 2. Scope of the checklist that was based on specific references. 3. effectiveness of CTAs has not been analyzed as other authors already have done 4. Analysis from European perspective
Hatamian 2021	A privacy and security analysis of early-deployed COVID-19 contact tracing Android apps.	Empirical Software Engineering	03/19/2021	App-Review	1. What private sensitive data do the COVID-19 apps aim to extract from the users? 2. Does the app's behavior match has been indicated in their privacy policies? 3. Are there vulnerabilities that would undermine the information security and privacy protection goals? 4. To which extent are the studies compliant with legal requirements (especially the GDPR)	Yes			n/a	Google Play Store; Other: APKMirror, APKPure	Play-store and location independant apk-stores	Direct search in Google-Play and APK-stores	Australia, Austria, Brazil, Columbia, Czech Republic, Germany, Hungary, Georgia, Iceland, India (3), Israel, Italy (2), Jordan, Malaysia (2), North Macedonia, Norway, Russia, Singapore, South Africa, UK, US (3), Global	Android, contact-tracing-app	no contact-tracing	code privileges, privacy policy coverage, dynamic and static code analysis	No		No			No											28	In median, CTAs required 12 permissions with 33% (n=4) of them being labeled as dangerous (e.g., access to precise and background location, contacts and microphone), while those labeled dangerous make 35.4% of all identified permissions. Dangerous permissions are consistently requested less in EU apps than non-EU apps. In privacy policy analysis, 35.7% (n=10) of apps fulfilled more than half of 1…			In contrast to claims by developers and the data minimization principle, a lot of apps actively record more data than would be needed for the sole purpose of contact-tracing. While some apps completely lacked privacy policies, many from other apps were only semi-transparent. Dynamic code analysis reveals how many apps actively record data in the background and tend to use more permissions than ne…		1. Android platform only (although authors believe generalization to apple is possible) 2. limited reproducibility due to variable contexts (app updates) 3. controlled environment during permission analysis 4. security analysis may suffer from false-positives
Zhang 2021	An Overview of Commercially Available Apps in the Initial Months of the COVID-19 Pandemic	Frontiers in Psychiatry	04/15/2021	App-Review	To identify commercial applications during the early days of the pandemic and to explore their functionalities.	Yes	03/27/2020	04/18/2022		Google Play Store; Apple App Store	Seach of Google Play and Apple App stores through the search engine "App Annie".	1. Search 2. Exclusion based on relevance to Covid-19	Argentina (1), Australia (1), Buenos Aires (1), Canada (2), Czech Republic (1), Dubai (2), Ecuador (1), France (2), Georgia (1), Germany (2), India (16), Ireland (2), Italy (3), Kenya (1), Laos (1), Libya (1), Mexico (4), Nepal (1), Netherlands (2), Pakistan (2), Peru (1), Philippines (1), Portugal (4), Republic of Armenia (1), Romania (1), Russia (3), Spain (9), United Arab Emirates (1), United …	commercial application, provides information on how it is used for COVID-19		name, description from app-store, functionality, country, category, release date, last updated, version, seller, app support, privacy policy, average ratings, total ratings	No		No														103	32 apps were from both app-stores, while 43 and 28 were uniquely available on Google Play and Apple App stores respectively. Most of the apps were from the United Kingdom (n=29) followed by the United States, Canada and Mexico (n=26). Most popular functionality was information provision (n=27). From the 3rd week of March 2020 to the 2nd week of April 2020 there is both an increase of infections a…			The review provides an overview about commercial applications on COVID 19. There has been a steady increase in release of apps between 15.02.2020 and 18.04.2020. Apps included in the review needed governmental affiliation to pass Google' and Apple's ban on commercial applications. Authors found no applications that assisted with psychological matters that may have been induced by COVID 19.		missed out apps that do not contain "Covid" within their names, did not identify apps from China, functionalities were not tested, limitations by resource and linguistic skills,
Akinbi 2021	Contact tracing apps for the COVID-19 pandemic: a systematic literature review of challenges and future directions for neo-liberal societies	Health Information Science and Systems	04/13/2021	Literature Review	What are the current challenges of contact tracing apps in neo-liberal societies? What recommendations can be implemented to address these challenges and improve mass acceptance? What are the future directions and considerations in the use of digital contact tracing technologies in the fight against future pandemic outbreaks?																Yes	No		01/01/2021	01/31/2021		Google Scholar, Web of Science, PubMed, IEEE Xplore Digital Library, PsycInfo, ScienceDirect	(“Contact Tracing” OR “Contact Tracing apps”) AND (“COVID-19” OR “Coronavirus”)	Peer-reviewed publication, Preprint, Report of credible source, relevant to contact-tracing technology and its application in the context of COVID 19, related to the research questions, English	Not relevant to the topic, duplications, not written in English	1. Primary Search 2. Deduplication 3. Selection based on title, abstract and content 4. Quality Assessment	Subjects			61	Subjects in descending order: Privacy concerns (45%), User behaviour and participation (16%), Ethical Issues (12%), Lack of Trust and Security Vulnerabilities (10%), Technical constraints (7%)		RQ1 Current challenges: Justifying infringement of data privacy in the context of expected positive pandemic progression, balancing trust in governmental organizations and public health, handling proximity warnings as not everyone has access to home-office work, possibility of discrimination of behavioral or geographical profiles, data security concerns especially in the context of outdated hardw…	None declared
Jenniskens 2021	Effectiveness of contact tracing apps for SARS-CoV-2: A rapid systematic review	BMJ Open	12/07/2021	Literature Review	Narrative synthesis on effectiveness of CTAs for SARS-CoV-2 on epidemiological outcomes in empirical and (mostly) model-based studies.	No															Yes	Yes		10/28/2020	10/28/2020		Bern Covid-19 Open Access Project database (EMBASE, Medline, BioRxiv, MedRxiv)	(contact OR tracing OR track OR tracking OR warn OR warning) AND (smartphone OR app OR smartwatch OR device OR mobile OR smart phone OR bluetooth OR wearable OR iphone OR cell phone	Empirical (observational and experimental) or model-based study, evaluating effectiveness of CTAs for SARS-CoV-2, peer-reviewed and preprint		1. search 2. title/abstract screening 3. full-text-screening 4. inclusion	CTAs were included if they provided feedback about potential recent exposure to infected people based on proximity measures | Epidemiological outcomes include the reproduction number (R), total number of infections, hospitalization and mortality rate			17	Out of the 17 studies, the two empirical studies were judged to have a high risk of bias. Model-based studies, out of which 3 were judged to have a high risk of bias, assessed effectiveness of CTAs in one or more scenarios with varying input values. Modelling studies generally found CTAs being able to reduce the R value, with higher R values requiring the use of additional measures (isolation, hy…	Mode-based studies provide insight on how use of CTAs can reduce R, number of infections and mortality rate. Such effects were already observed at adoption rates as low as 20% while generally higher adoption rated were associated with higher decrease. Shortening delays of CTA notification may increase effectiveness. The review only identified two observational comparative studies that were judged…	studies that have not been identified by the review, complexity of model-based studies with numerous input variables influencing model progression. Summarization of mode-based studies suffers from simplification,
Alshawi 2022	Data privacy during pandemics: a systematic literature review of COVID-19 smartphone applications.	PeerJ Computer Science	04/01/2022	Literature Review	What techniques are proposed to protect users' privacy in digital surveillance? How does the law protect users' privacy in COVID 19 applications? How do different entities contribute to preserving individual's health privacy?	Yes				Other: Extracted out of literature											Yes	No					Microsoft Academic, Wiley Online Library, IEEE Xplore, Sage Journals, Taylor & Francis Group, Springer Link, Science Direct, Scopus Preview, ACM Digital Library, Web of Science	“Privacy” AND (“mobile application” OR “apps”) AND (“COVID-19” OR “COVID-19” OR “COVID-19 virus” OR “COVID-19 pandemic”), “Privacy” AND (“mobile application” OR “apps”) AND (“COVID-19” OR “COVID-19” OR “COVID-19virus” OR “COVID-19 pandemic”) AND (“contact-tracing” OR “location privacy” OR “data protection” OR “privacy protection”)	English, between 2019 and 2020, journals and magazines, using exact keyword strings	Non-English, before 2019, other document types, mentioning COVID 19 without privacy and vice versa	1. Research Question 2. Search Strategy (Keywords, Search Strings, Sources) 3. Inclusion and Exclusion 4. Quality Criteria Assessment 5. Document Search Strategy 6. Snowballing				40	Tabular and geographical overview of 43 contact tracing apps available at the time. A comparison between centralized and decentralized contact-tracing shows how centralized approaches allow for more effective control of the pandemic at the cost of data privacy. In Asian countries, the centralized approach is more widely used due to governmental regulations and wider public acceptance to trade in …		Governments should develop policies ensuring privacy to raise public compliance. There is a need to provide general access to the internet for people to have access to contact tracing apps.	Studies did not cover all COVID 19 key words and did not consider differences in values and cultural and political aspects of different countries. The review is limited to before 30.04.2020.
